# Supplementary material for: Liquid metal-supported synthesis of cupric oxide
Source: Royal Society of Chemistry journal article supplement (doi:10.1039/c9tc06883j), 2019-12-23
Supplement: c9tc06883j1.pdf [file c9tc06883j1.pdf]

## **Electronic Supplementary Information**

### **Liquid Metal-Supported Synthesis of Cupric Oxide**

Hongzhe Li,<sup>a</sup> Roozbeh Abbasi,<sup>a</sup> Yifang Wang,<sup>a</sup> Francois M. Allieux,<sup>a</sup> Pramod Koshy,<sup>b</sup> Shuhada A. Idrus-Saidi,<sup>a</sup> Md Arifur Rahim,<sup>a</sup> Jiong Yang,<sup>a</sup> Maedehsadat Mousavi,<sup>a</sup> Jianbo Tang,<sup>a</sup> Mohammad B. Ghasemian,<sup>a</sup> Rouhollah Jalili,<sup>a</sup> Kourosh Kalantar-Zadeh,<sup>a\*</sup> and Mohannad Mayyas<sup>a\*</sup>

<sup>a</sup>School of Chemical Engineering, University of New South Wales (UNSW), Sydney, NSW 2052, Australia.

<sup>b</sup>School of Materials Science and Engineering, University of New South Wales (UNSW), Sydney, NSW 2052, Australia.

\* Corresponding authors, E-mail: [k.kalantar-zadeh@unsw.edu.au](mailto:k.kalantar-zadeh@unsw.edu.au) (K.K.); [m.mayyas@unsw.edu.au](mailto:m.mayyas@unsw.edu.au) (M.M.)

#### **Contents**

- Fig. S1.** X-ray diffraction analysis of CuO and Cu<sub>2</sub>O reference samples. (A) XRD patterns. (B) Rietveld phase quantification.
- Fig. S2.** Tauc plots extrapolated from data in Fig. 5. (A) Tauc plot of the visible light absorption spectrum in the wavelength range of 480 to 680 nm. (B) Tauc plots of the near infrared light absorption spectra in the range of 950 to 1800 nm.
- Fig. S3.** SEM images of sheets exfoliated from the surface of the bulk LM. The sheet was obtained by limiting the reaction time to 1 sec. The sample was touch-printed on Si wafer. In this experiment, 50 µL of 1.0 M NaOH solution was added onto a galinstan droplet (120 µL) in a glass petri-dish. The NaOH solution was left on galinstan for 2.0 min before it was removed using a Pasteur pipette. Approximately 4.5 ml of stock solution (made from 8 ml of 0.25 M NH<sub>4</sub>OH and 14 ml of 0.01 M CuSO<sub>4</sub>) of pH = 10.5 was added over galinstan (120 µL).
- Fig. S4.** AFM analysis of smooth and thin sheets exfoliated from the surface of the bulk LM. The sheet was obtained by limiting the reaction time to 1 sec. The sample was touch-printed on Si-SiO<sub>2</sub> wafer. Details of synthesis conditions are given in the caption of Fig. S3.
- Fig. S5.** SEM Images of Cu<sub>x</sub>O-micronised LM composites synthesised at different pH.
- Fig. S6.** SEM images of CuO-micronised LM composites obtained at different temperatures, pH of 10.5, and 45 min reaction time.
- Table S1.** Summary of previous research on the photocatalytic activity of CuO (single phase and composite).

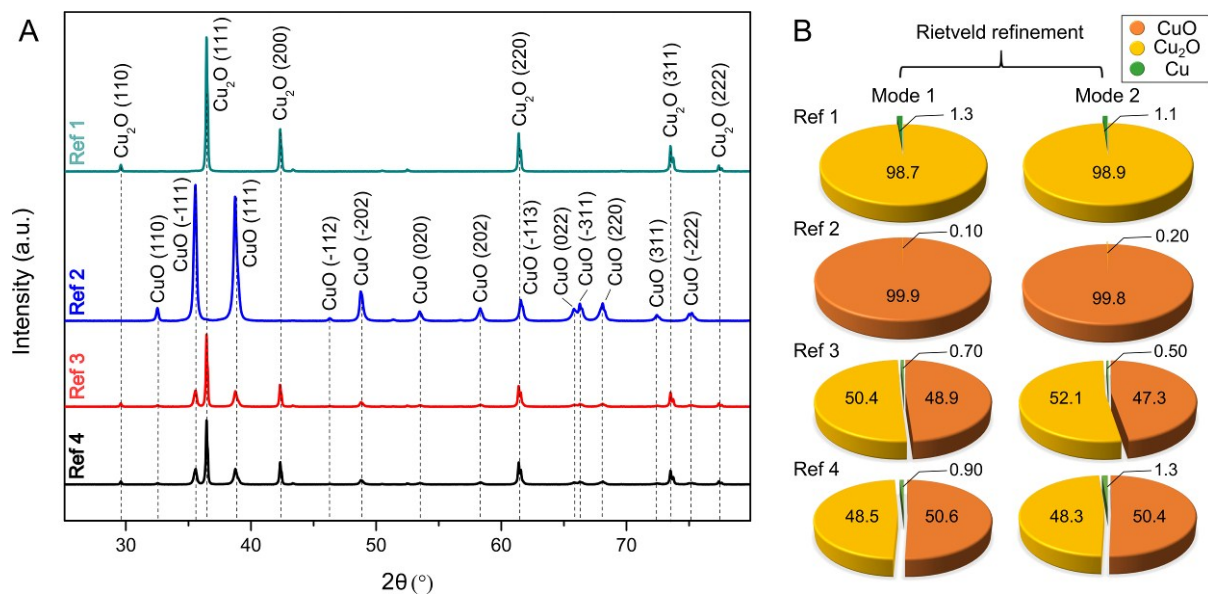

**Fig. S1.** X-ray diffraction analysis of CuO and  $\text{Cu}_2\text{O}$  reference samples. (A) XRD patterns. (B) Rietveld phase quantification.

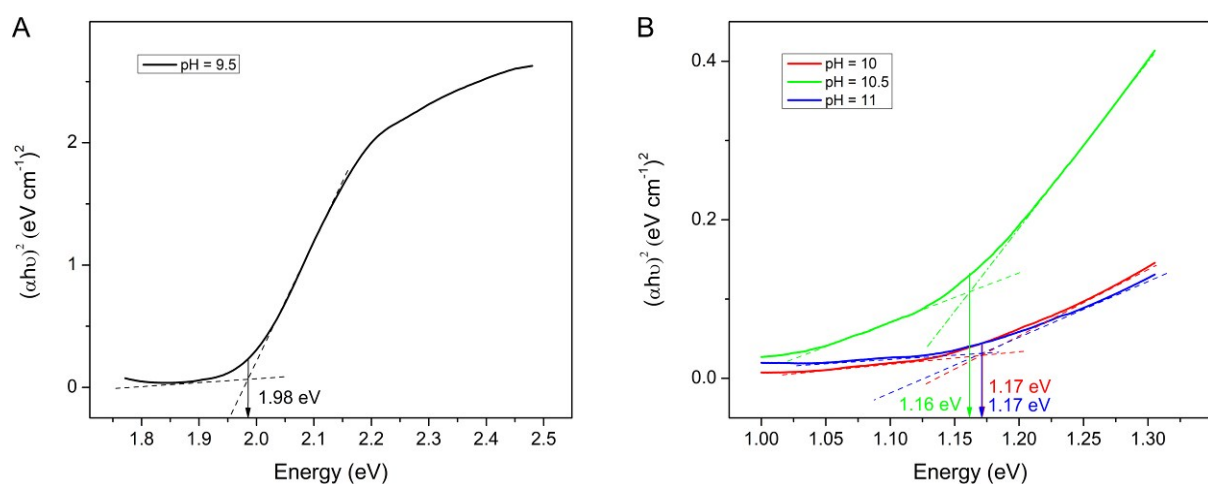

**Fig. S2.** Tauc plots extrapolated from data in Fig. 5. (A) Tauc plot of the visible light absorption spectrum in the wavelength range of 480 to 680 nm. (B) Tauc plots of the near infrared light absorption spectra in the range of 950 to 1800 nm.

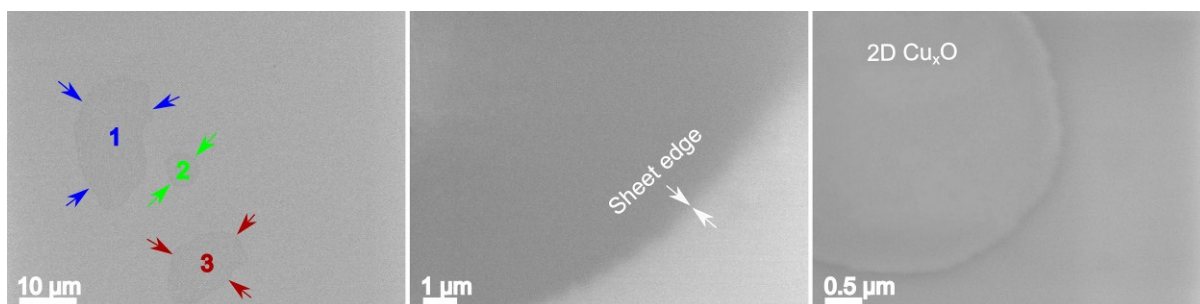

**Fig. S3.** SEM images of sheets exfoliated from the surface of the bulk LM. The sheet was obtained by limiting the reaction time to 1 sec. The sample was touch-printed on Si wafer. In this experiment, 50  $\mu\text{L}$  of 1.0 M NaOH solution was added onto a galinstan droplet (120  $\mu\text{L}$ ) in a glass petri-dish. The NaOH solution was left on galinstan for 2.0 min before it was removed using a Pasteur pipette. Approximately 4.5 ml of stock solution (made from 8 ml of 0.25 M  $\text{NH}_4\text{OH}$  and 14 ml of 0.01 M  $\text{CuSO}_4$ ) of pH = 10.5 was added over galinstan (120  $\mu\text{L}$ ).

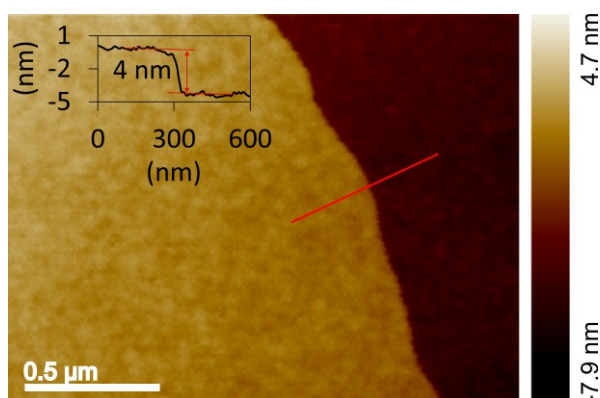

**Fig. S4.** AFM analysis of smooth and thin sheets exfoliated from the surface of the bulk LM. The sheet was obtained by limiting the reaction time to 1 sec. The sample was touch-printed on Si-SiO<sub>2</sub> wafer. Details of synthesis conditions are given in the caption of Fig. S3.

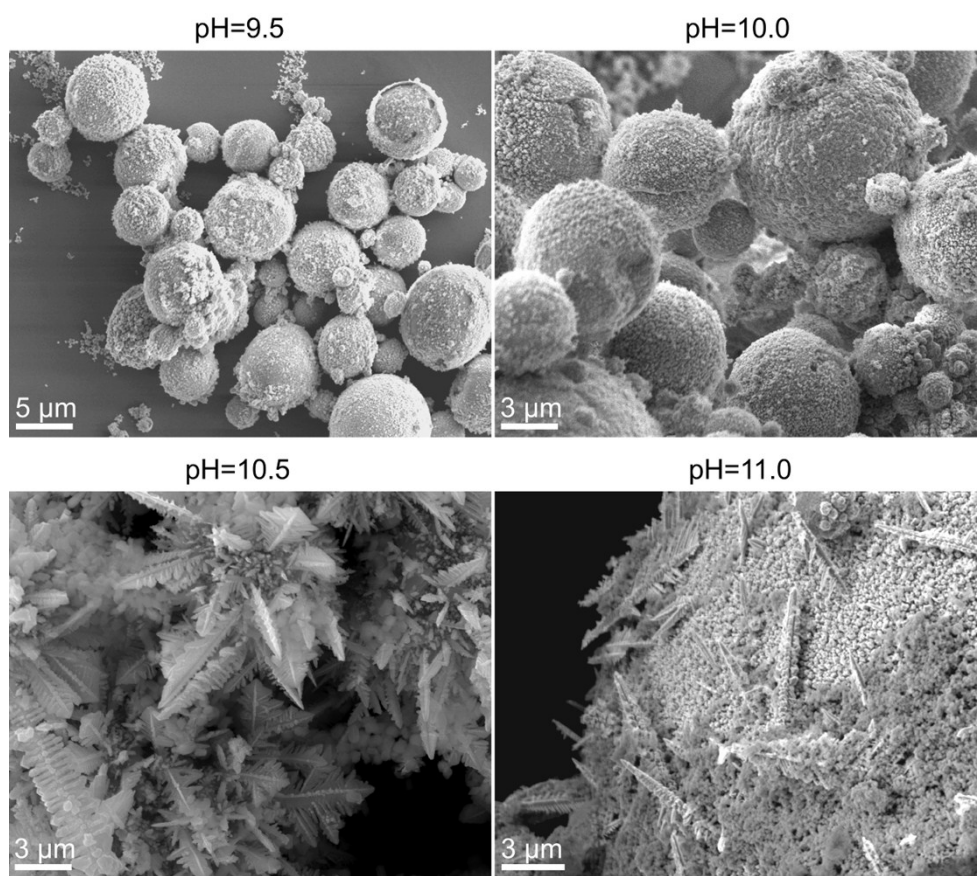

**Fig. S5.** SEM Images of  $\text{Cu}_x\text{O}$ -micronised LM composites synthesised at different pH.

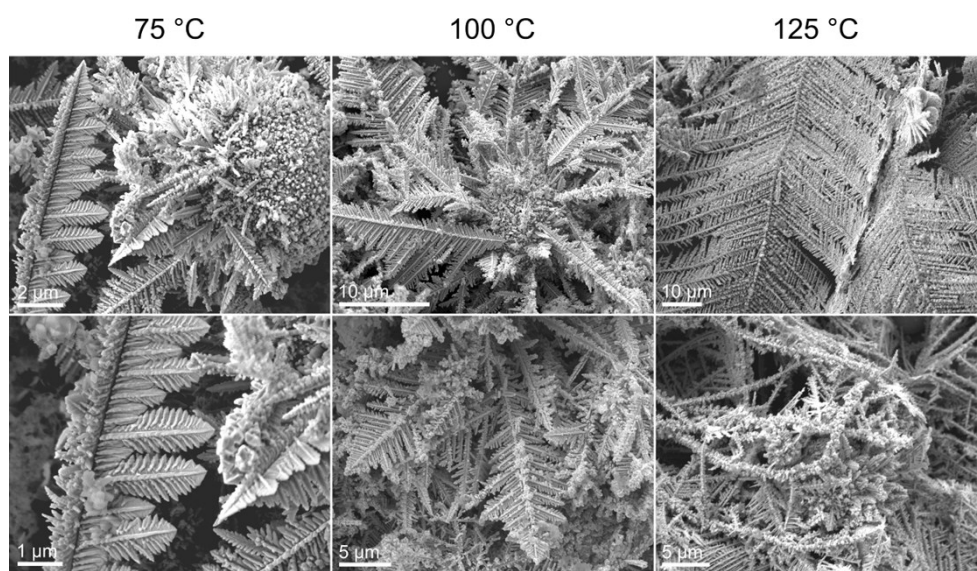

**Fig. S6.** SEM images of  $\text{CuO}$ -micronised LM composites obtained at different temperatures, pH of 10.5, and reaction time.

**Table S1.** Summary of previous research on the photocatalytic activity of CuO (single phase and

| Catalyst                             | Morphology of the catalyst | Catalyst loading (g/L) | Light source       | Co-catalyst                   | Photocatalytical conversion after 120 min | References |
|--------------------------------------|----------------------------|------------------------|--------------------|-------------------------------|-------------------------------------------|------------|
| CuO/LM                               | Dendritic                  | 0.2                    | 100 W xenon lamp   | N/A                           | 96%                                       | This work  |
| CuO/Cu <sub>2</sub> O                | Thin films                 | N/A                    | 300 W xenon lamp   | N/A                           | 80%                                       | [1]        |
| Cu <sub>2</sub> O/Cu                 | Nanowires                  | 0.28                   | 300 W xenon lamp   | N/A                           | 67%                                       | [2]        |
| CuO                                  | Nano-clinoptilolites       | 0.2                    | 75 W mercury lamp  | N/A                           | 30%                                       | [3]        |
| CuO/zeoliteX                         | Nanoparticles              | 0.1                    | 75 W mercury lamp  | N/A                           | 4%                                        | [4]        |
| CuO/Graphene oxide                   | Nanoparticles              | 0.2                    | N/A                | H <sub>2</sub> O <sub>2</sub> | 70%                                       | [5]        |
| CuO/graphene/TiO <sub>2</sub>        | Frost-like                 | 0.5                    | N/A                | N/A                           | 60%                                       | [6]        |
| CuO/CeO <sub>2</sub> /Graphene oxide | Agglomerates               | 0.5                    | 300 W xenon lamp   | H <sub>2</sub> O <sub>2</sub> | 95%                                       | [7]        |
| CuO/TiO <sub>2</sub> /Graphene       | Nano-sheets                | 0.6                    | 100 W mercury lamp | N/A                           | 44%                                       | [8]        |

composite).

## References

1. N. Dasineh Khiavi; R. Katal; S. Kholghi Eshkalak; S. Masudy-Panah; S. Ramakrishna; H. Jiangyong, *Nanomater.* 2019, **9**, 1011.
2. W. Chen; Z. Fan; Z. Lai, *J. Mater. Chem. A* 2013, **1**, 13862-13868.
3. A. Nezamzadeh-Ejhieh; H. Zabihi-Mobarakeh, *J. Ind. Eng. Chem.* 2014, **20**, 1421-1431.
4. A. Nezamzadeh-Ejhieh; M. Karimi-Shamsabadi, *Appl. Catal. A-Gen.* 2014, **477**, 83-92.
5. N. Yusoff; N. Huang; M. Muhamad; S. Kumar; H. Lim; I. Harrison, *Mater. Lett.* 2013, **93**, 393-396.
6. D. C. T. Nguyen; K. Y. Cho; W. C. Oh, *Appl. Surf. Sci.* 2017, **412**, 252-261.
7. T. Huang; J. Wu; Z. Zhao; T. Zeng; J. Zhang; A. Xu; X. Zhou; Y. Qi; J. Ren; R. Zhou, *Mater. Lett.* 2016, **185**, 503-506.
8. Y. Fang; R. Wang; G. Jiang; H. Jin; Y. Wang; X. Sun; S. Wang; T. Wang, *Bull. Mater. Sci.* 2012, **35**, 495-499.
